# Supplementary material for: MyPro: A seamless pipeline for automated prokaryotic genome assembly and annotation
Source: PubMed Central journal article supplement — J Microbiol Methods. Author manuscript; Available in PMC 2016 Apr 12. (PMC4828917; doi:10.1016/j.mimet.2015.04.006), 2015-04-21
Supplement: NIHMS767653-supplement-Supplement.pdf [file NIHMS767653-supplement-Supplement.pdf]

## Installation of MyPro

### Download Virtual Box

<https://www.virtualbox.org/wiki/Downloads>

**Download MyPro.ova:** <http://sb.nhri.org.tw/MyPro/index.html>

Other information at: <http://sourceforge.net/projects/sb2nhri/files/MyPro/>

Open VirtualBox

File -> Import Appliance...

Select the file (MyPro.ova) to import

MyPro.ova

Or, directly double click on MyPro.ova

Please check the box of "Reinitialize the MAC address of all network cards"

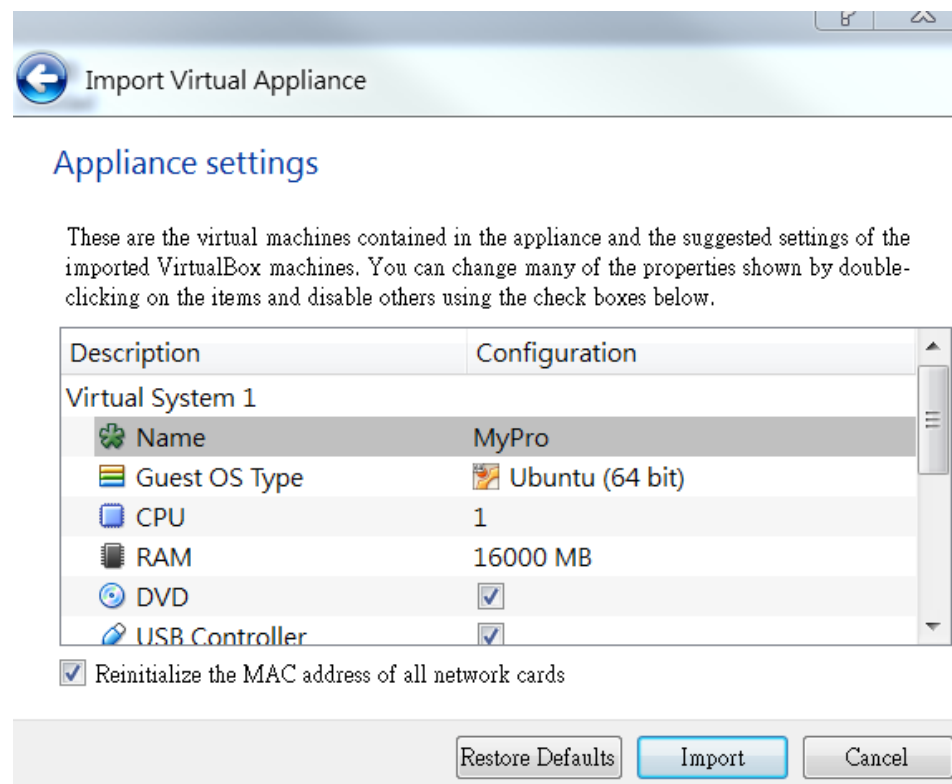

Import

Open Terminal

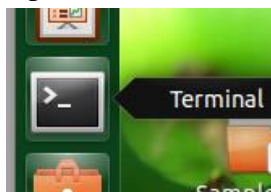

## Quick-start guide of MyPro

### A. Pre-process

This script is used to trim, pair and sub-sample your raw reads. A total of 100X (paired) reads are generated. This process is strongly recommended, otherwise much computational time is required for genome assembly.

Command:

```
Preprocess.py -read1 S.gordonii_G9B_TTAGGC_L001_R1_001.fastq -read2  
S.gordonii_G9B_TTAGGC_L001_R2_001.fastq -g 2200000
```

**Preprocess.py -h** for help.

### B. AutoRun

This script is used to perform Assemble, Integrate and Annotate.

Command:

```
AutoRun.py G9B -read1 50X_R1.fastq -read2 50X_R2.fastq -evaluate -p '--prefix  
G9B --genus Streptococcus --species gordonii --strain G9B --addgenes --locustag  
AA01'
```

**AutoRun.py -h, Assemble.py -h, Integrate.py -h and Annotate.py -h** for help.

### C. Post-assembly

This script is to (1) merge your ordered contigs if they are overlapped and (2) fill gaps with the contigs of local assembling.

(Optional) To use r2cat.jar for ordering your contigs against a related reference genome. You can Export contigs order (FASTA) and Export unmatched contigs (FASTA) separately.

Command:

```
Postassemble.py -o cisa.ordered.fa -u unmatched.fa -read1 ../50X_R1.fastq  
-read2 ../50X_R2.fastq
```

No reference genome:

```
Postassemble.py -u cisa.ctg.fa -read1 ../50X_R1.fastq -read2 ../50X_R2.fastq
```

**Postassemble.py -h** for help.

## Validation of MyPro on three bacterial species

### Dataset: *E. coli* MG1655

Paired reads of *E. coli* MG1655 are available at Illumina website. Mate1 and Mate 2 were downloaded separately.

Mate1:

```
ftp://webdata.webdata@ussd-ftp.illumina.com/Data/SequencingRuns/MG1655/MiSeq_Ecoli_MG1655_110721_PF_R1.fastq.gz
```

Mate2:

```
ftp://webdata.webdata@ussd-ftp.illumina.com/Data/SequencingRuns/MG1655/MiSeq_Ecoli_MG1655_110721_PF_R2.fastq.gz
```

```
Preprocess.py -read1 MiSeq_Ecoli_MG1655_110721_PF_R1.fastq -read2 MiSeq_Ecoli_MG1655_110721_PF_R2.fastq -g 4650000
```

```
manager@bl8vbox[Data] GetReadInfo.py 4650000 50X_R1.fastq 4650000 50X_R1.fastq  
seqs amount:1550000  
seqLen Mean:150.000000  
seqLen Std:0.000000  
total:232.50 Mb  
depth: 50.00X
```

This process took about 40 min.

```
AutoRun.py MG1655 -read1 50X_R1.fastq -read2 50X_R2.fastq
```

This process took about 4 hr for running in a VirtualBox with 16GB RAM @ Dell Precisions Workstations T1600 Computer Workstation (Quad Core Xeon E3-1245, 3.30 GHz with 32GB RAM)

cisa.ctg.fa Alignment:99.34%

whole:4625288

N50: 88512

Number of contigs: 104

Length of the longest contig: 315566

Use **r2cat** to align cisa.ctg.fa against a reference (*E. coli* DH10B, [NC\\_010473](#)), then export the ordered assembly.

Click on r2cat.far located on Desktop

File --> Match new

Query: cisa.ctg.fa  
Target: NC\_010473.fna  
Start Matching  
Continue  
Options --> Sort queries  
File --> Export contigs order (FASTA)

**Postassemble.py** -o cisa.ctg.ordered.fa -read1 ../50X\_R1.fastq  
-read2 ../50X\_R2.fastq

Alignment:99.32%  
N50.py Bridged.ctg.fa  
whole:4608751  
N50: 105185  
Number of contigs: 71  
Length of the longest contig: 335840  
Dot plot against the reference genome ([NC\\_000913](#)) by r2cat:

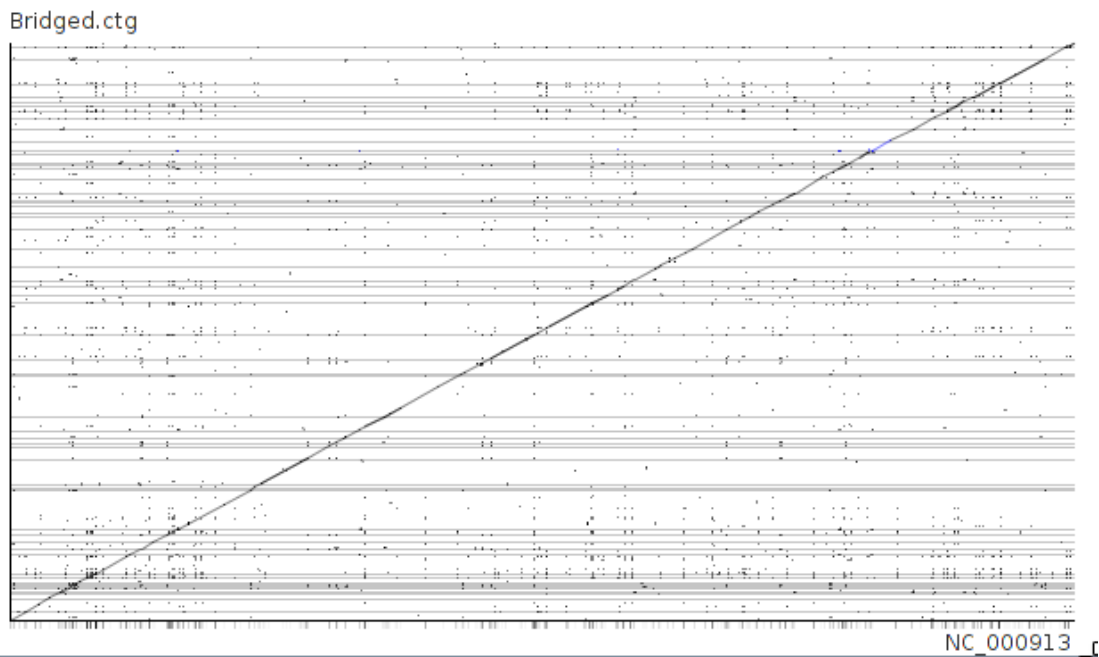

#### Quast 2.3 Evaluation:

```
quast.py -o quast -R NC_000913.fna -G NC_000913.gff raw.abysc.ctg.fa  
raw.edena.ctg.fa raw.velvet.ctg.fa raw.soap.ctg.fa raw.spades.ctg.fa cisa.ctg.fa  
Bridged.ctg.fa
```

NC\_000913.fna and NC\_000913.gff can be downloaded from [here](#).

## QUAST report

13 November 2014, Thursday, 02:43:14

All statistics are based on contigs of size  $\geq 500$  bp, unless otherwise noted (e.g., "# contigs ( $\geq 0$  bp)" and "Total length ( $\geq 0$  bp)" include all contigs.)

### Extended report

Genome: 4 641 652 bp, G+C content: 50.79 %  
4516 genes

| Statistics without reference | raw.abysc.ctg   | raw.edena.ctg   | raw.velvet.ctg  | raw.soap.ctg    | raw.spades.ctg | cisa.ctg       | Bridged.ctg    |
|------------------------------|-----------------|-----------------|-----------------|-----------------|----------------|----------------|----------------|
| # contigs                    | 362             | 363             | 318             | 526             | 131            | 104            | 71             |
| Largest contig               | 85 610          | 68 181          | 85 370          | 58 371          | 224 038        | 315 566        | 335 840        |
| Total length                 | 4 576 900       | 4 525 060       | 4 576 844       | 4 555 491       | 4 567 001      | 4 625 288      | 4 608 751      |
| N50                          | 21 569          | 21 492          | 27 298          | 15 329          | 77 529         | 88 512         | 105 185        |
| <b>Misassemblies</b>         |                 |                 |                 |                 |                |                |                |
| # misassemblies              | 1               | 2               | 6               | 0               | 0              | 1              | 4              |
| Misassembled contigs length  | 37 134          | 47 106          | 224 058         | 0               | 0              | 222 869        | 447 995        |
| <b>Mismatches</b>            |                 |                 |                 |                 |                |                |                |
| # mismatches per 100 kbp     | 2.260           | 0.24            | 2.75            | 0.35            | 3.4            | 4.59           | 4.940          |
| # indels per 100 kbp         | 2.220           | 0.02            | 0.570           | 0.09            | 0.46           | 0.39           | 0.43           |
| # N's per 100 kbp            | 64.59           | 0               | 483.65          | 0               | 0              | 0              | 0              |
| <b>Genome statistics</b>     |                 |                 |                 |                 |                |                |                |
| Genome fraction (%)          | 98.014          | 97.449          | 97.871          | 97.767          | 98.08          | 99.066         | 99.087         |
| Duplication ratio            | 1.006           | 1               | 1.007           | 1.003           | 1              | 1.006          | 1.003          |
| # genes                      | 4167 + 316 part | 4139 + 320 part | 4056 + 378 part | 4033 + 380 part | 4361 + 60 part | 4420 + 76 part | 4434 + 62 part |
| NGA50                        | 21 419          | 21 163          | 26 259          | 14 936          | 77 529         | 88 512         | 104 044        |

To copy Bridged.ctg.fa to the folder of Assemble

cp Bridged.ctg.fa Assemble/

**Annotate.py** MG1655 -i Bridged.ctg.fa -p ' --genus Escherichia --species coli --strain  
MG1655 --prefix post'

organism: Escherichia coli MG1655

contigs: 71

bases: 4608751

rRNA: 8

tmRNA: 1

tRNA: 74

CDS: 4309

repeat\_region: 2

Detailed log: post.log

Walltime used: 8.00 minutes

Because we have updated the databases for Prokka, the number of hypothetical proteins was reduced from 668 to 657 (Swiss-Prot update) and to 414 (High quality genus database). Meanwhile, the running time was minor increased from 13.13 min to 13.73 min (Swiss-Prot update) but greatly decreased to 8 min (using genus db). If RefSeq bacterial genomes were used as genus database, the number of hypothetical proteins was reduced to 369 but the running time increased to more than 20 min.

**Dataset: *S. aureus***

Strain: *S. aureus* MW2

Sequencing reads were downloaded from

<ftp://ftp-trace.ncbi.nlm.nih.gov/sra/sra-instant/reads/ByRun/sra/SRR/SRR857/SRR857914>

**Preprocess.py** -read1 SRR857914\_1.fastq -read2 SRR857914\_2.fastq -g 2800000

This process took about 20 min.

**AutoRun.py** MW2 -read1 50X\_R1.fastq -read2 50X\_R2.fastq

2014-11-21,02:27 ==> 2014-11-21,04:34

Alignment %:

raw.soap.ctg.fa: 94.97  
raw.abysc.ctg.fa: 95.17  
raw.spades.ctg.fa: 99.31  
raw.velvet.ctg.fa: 99.46  
raw.edena.ctg.fa: 99.59

cisa.ctg.fa Alignment: **93.86%**

whole: 2768641

N50: 1419734

Number of contigs: 5

Length of the longest contig: 1419734

To increase genome size for assembly integration:

**Integrate.py** MW2 -i abyss.ctg.fa,edena.ctg.fa,velvet.ctg.fa,spades.ctg.fa -evaluate  
**-gs 3000000**

cisa.ctg.fa Alignment: 99.51%

whole: 2830305

N50: 1419734

Number of contigs: 7

Length of the longest contig: 1419734

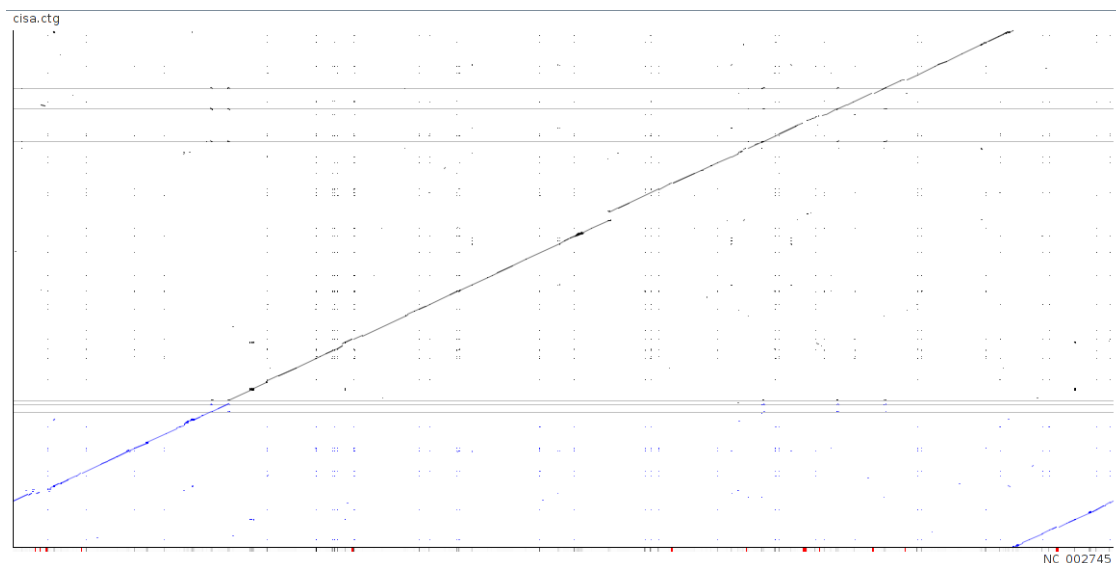

**Postassemble.py** -o cisa.ordered.fa -read1 ../../50X\_R1.fastq -read2 ../../50X\_R2.fastq  
-m 423 -s 71

N50.py Bridged.ctg.fa

whole:2830305

N50: 1419734

Number of contigs: 7

Length of the longest contig: 1419734

Alignment:99.51%

Identical assembly was obtained (to cisa.ctg.fa) after post-assembly!

### Quast 2.3 Evaluation

quast.py -o quast -R NC\_003923.fna -G NC\_003923.gff raw.abysst.ctg.fa  
raw.edena.ctg.fa raw.velvet.ctg.fa raw.soap.ctg.fa raw.spades.ctg.fa cisa.ctg.fa

#### **QUAST report**

21 November 2014, Friday, 06:01:59

All statistics are based on contigs of size >= 500 bp, unless otherwise noted (e.g., "# contigs (>= 0 bp)" and "Total length (>= 0 bp)" include all contigs.)

[Extended report](#)      **worst.....best**

Genome: 2 820 462 bp, G+C content: 32.83 %  
2703 genes

| Statistics without reference | raw.abysst.ctg | raw.edena.ctg  | raw.velvet.ctg | raw.soap.ctg   | raw.spades.ctg | cisa.ctg      |
|------------------------------|----------------|----------------|----------------|----------------|----------------|---------------|
| # contigs                    | 18             | 18             | 8              | 78             | 43             | 7             |
| Largest contig               | 940 710        | 539 806        | 1 413 768      | 138 695        | 410 165        | 1 419 734     |
| Total length                 | 2 826 349      | 2 816 795      | 2 815 477      | 2 783 529      | 2 808 157      | 2 830 305     |
| N50                          | 383 680        | 268 019        | 1 413 768      | 69 354         | 147 491        | 1 419 734     |
| <b>Misassemblies</b>         |                |                |                |                |                |               |
| # misassemblies              | 0              | 0              | 2              | 0              | 2              | 0             |
| Misassembled contigs length  | 0              | 0              | 1 413 768      | 0              | 347 121        | 0             |
| <b>Mismatches</b>            |                |                |                |                |                |               |
| # mismatches per 100 kbp     | 4.83           | 1              | 1.93           | 0.04           | 6.1            | 4.020         |
| # indels per 100 kbp         | 0.11           | 0              | 0.68           | 0              | 0.43           | 0             |
| # N's per 100 kbp            | 1.8            | 0              | 79.84          | 0              | 0              | 0             |
| <b>Genome statistics</b>     |                |                |                |                |                |               |
| Genome fraction (%)          | 99.752         | 99.126         | 99.011         | 98.62          | 98.748         | 99.606        |
| Duplication ratio            | 1.005          | 1              | 1.001          | 1.001          | 1              | 1             |
| # genes                      | 2697 + 3 part  | 2685 + 10 part | 2674 + 10 part | 2632 + 41 part | 2640 + 15 part | 2694 + 1 part |
| NGA50                        | 383 680        | 268 019        | 1 054 961      | 69 354         | 147 491        | 1 419 520     |

### Dataset: *R. sphaeroides* 2.4.1

[http://systems.illumina.com/systems/miseq/scientific\\_data.html](http://systems.illumina.com/systems/miseq/scientific_data.html)

The *B. cereus* ATCC 10987 & *R. sphaeroides* ATCC BAA-808 samples were sequenced on the MiSeq System using the new MiSeq Reagent Kit v3 at a 2 x 300 bp read length configuration with dual indexing. The total yield was 17.8 Gb with 70% of bases at or above Q30. The average fragment length for this data set is 475 bp.

**fastqc** Rhodo\_S2\_L001\_R2\_001.fastq

#### Per base sequence quality

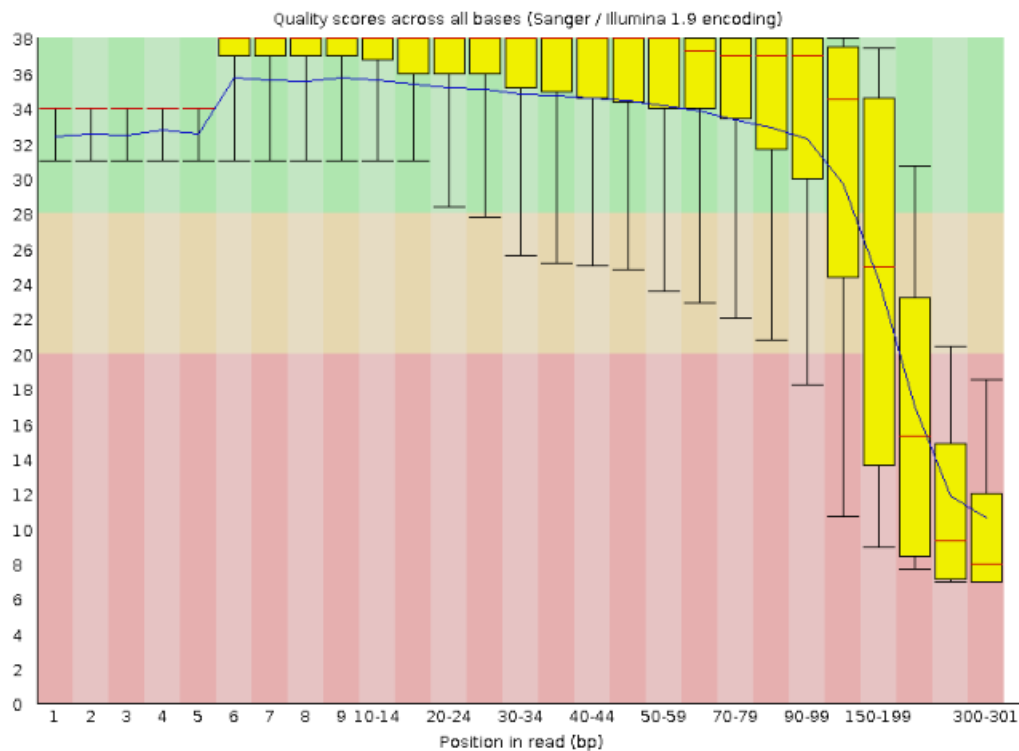

**Preprocess.py** -read1 Rhodo\_S2\_L001\_R1\_001.fastq -read2

Rhodo\_S2\_L001\_R2\_001.fastq -g 4600000

This process took about 4 hr! Paired reads were trimmed to 200 bp.

**AutoRun.py** Miseq300 -read1 50X\_R1.fastq -read2 50X\_R2.fastq

2014-11-14,00:23 ==> 2014-11-14,04:19

n50:

soap.ctg.fa: 19291

velvet.ctg.fa: 20714



edena.ctg.fa: 22179  
abyss.ctg.fa: 22737  
spades.ctg.fa: 77772

Ctgs:

soap.ctg.fa: 403  
velvet.ctg.fa: 373  
abyss.ctg.fa: 345  
edena.ctg.fa: 293  
spades.ctg.fa: 142

The longest ctg's length:

soap.ctg.fa: 69823  
abyss.ctg.fa: 97096  
edena.ctg.fa: 97244  
velvet.ctg.fa: 97422  
spades.ctg.fa: 320329

WholeGenome:

edena.ctg.fa: 4014722  
abyss.ctg.fa: 4292653  
soap.ctg.fa: 4339440  
velvet.ctg.fa: 4369665  
spades.ctg.fa: 4429967

Alignment %:

raw.edena.ctg.fa: 95.82  
raw.abyss.ctg.fa: 97.90  
raw.soap.ctg.fa: 98.19  
raw.velvet.ctg.fa: 98.21  
raw.spades.ctg.fa: 98.24

Keep all assemblies.

cisa.ctg.fa Alignment:98.26%

whole:4401027

N50: 79366

Number of contigs: 130

Length of the longest contig: 320634

r2cat against the reference *R.sphaeroides* 2.4.1

([http://sb.nhri.org.tw/CISA/upload/en/2013/8/R\\_sphaeroides.fna-01021413.gz](http://sb.nhri.org.tw/CISA/upload/en/2013/8/R_sphaeroides.fna-01021413.gz)).

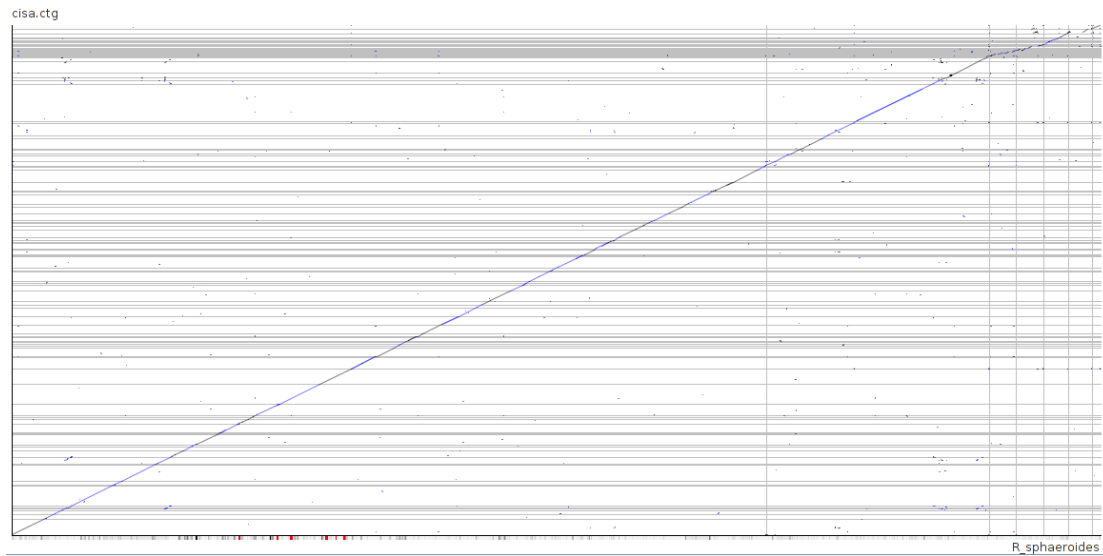

**Postassemble.py** -o ordered.cisa.fa

N50.py Bridged.ctg.fa

whole:4391111

N50: 87718

Number of contigs: 120

Length of the longest contig: 320634

Alignment:98.26%

## Validation of MyPro on 18 oral streptococcal species

Take G9B as an example:

Illumina HiSeq2500 reads for *Streptococcus gordonii* G9B

```
AutoRun.py G9B -read1 S.gordonii_G9B_TTAGGC_L001_R1_001.fastq -read2  
S.gordonii_G9B_TTAGGC_L001_R2_001.fastq
```

2014-09-30,13:21 ==> 2014-09-30,23:58

This process took about 10 hr in a linux server!

cisa.ctg.fa Alignment:91.11%

whole:2206208

N50: 556432

Number of contigs: 7

Length of the longest contig: 641667

Use **r2cat** to align cisa.ctg.fa against [NC\\_009785](#), then export the ordered assembly and the unmatched assembly.

```
Postassemble.py -o cisa.ordered.fa -u cisa.unmatched.fa  
-read1 ../S.gordonii_G9B_TTAGGC_L001_R1_001.fastq  
-read2 ../S.gordonii_G9B_TTAGGC_L001_R2_001.fastq
```

Alignment:91.11%

whole:2203707

N50: 1555780

Number of contigs: 3

Length of the longest contig: 1555780

Please note that there are three contigs in Bridged.ctg.fa.

>ref\_3\_len:6260

>ref\_1\_len:1555780

>ref\_2\_len:641667

The first one is a circular genome, and is likely to be a phage!

## Quast 2.3 Evaluation

```
quast.py -o Quast_G9B raw.abysst.ctg.fa raw.edena.ctg.fa raw.velvet.ctg.fa  
raw.soap.ctg.fa raw.spades.ctg.fa CISA.ctg.fa cisa.ctg.fa Bridged.ctg.fa
```

### QUAST report

24 December 2014, Wednesday, 16:07:26

All statistics are based on contigs of size  $\geq 500$  bp, unless otherwise noted (e.g., "# contigs ( $\geq 0$  bp)" and "Total length ( $\geq 0$  bp)" include all contigs.)

Extended report

worst.....best

| Statistics without reference | raw.abysst.ctg | raw.edena.ctg | raw.velvet.ctg | raw.soap.ctg | raw.spades.ctg | CISA      | cisa.ctg  | Bridged.ctg |
|------------------------------|----------------|---------------|----------------|--------------|----------------|-----------|-----------|-------------|
| # contigs                    | 15             | 16            | 16             | 80           | 381            | 10        | 7         | 3           |
| Largest contig               | 555 590        | 484 400       | 898 711        | 222 575      | 639 860        | 556 432   | 641 667   | 1 555 780   |
| Total length                 | 2 215 919      | 2 197 541     | 2 196 493      | 2 191 062    | 2 426 588      | 2 208 238 | 2 206 208 | 2 203 707   |
| N50                          | 343 271        | 335 948       | 483 119        | 78 330       | 334 420        | 344 471   | 556 432   | 1 555 780   |
| <b>Mismatches</b>            |                |               |                |              |                |           |           |             |
| # N's per 100 kbp            | 0              | 0             | 26.36          | 0            | 0.04           | 0.45      | 0         | 0           |

For 8 genomes, complete reference genome was available for the same oral streptococcal species. The N50 values and number of contigs from these genomes are summarized in Table 1 of the article. For 10 genomes, complete reference genome was not available. The N50 values and number of contigs from these genomes are summarized in Table 2 of the article.

Reference genomes:

*S. gordonii* G9B:

NC\_009785, [ftp://ftp.ncbi.nih.gov/genomes/Bacteria/Streptococcus\\_gordonii\\_Challis\\_substr\\_CH1\\_uid57667/NC\\_009785.fna](ftp://ftp.ncbi.nih.gov/genomes/Bacteria/Streptococcus_gordonii_Challis_substr_CH1_uid57667/NC_009785.fna)

*S. salivarius* KB005:

NC\_015760, [ftp://ftp.ncbi.nih.gov/genomes/Bacteria/Streptococcus\\_salivarius\\_CCHS\\_S3\\_uid70481/NC\\_015760.fna](ftp://ftp.ncbi.nih.gov/genomes/Bacteria/Streptococcus_salivarius_CCHS_S3_uid70481/NC_015760.fna)

*S. parasanguinis* MGH413:

NC\_015678, [ftp://ftp.ncbi.nih.gov/genomes/Bacteria/Streptococcus\\_parasanguinis\\_A\\_TCC\\_15912\\_uid49313/NC\\_015678.fna](ftp://ftp.ncbi.nih.gov/genomes/Bacteria/Streptococcus_parasanguinis_A_TCC_15912_uid49313/NC_015678.fna)

*S. cristatus* CC5A, CR3:

AEVC00000000.1,

[http://www.ncbi.nlm.nih.gov/nuccore?term=GL732518:GL732522\[PACC1](http://www.ncbi.nlm.nih.gov/nuccore?term=GL732518:GL732522[PACC1)

*S. mitis* OT25, SK145, SK137:

NC\_013853, [ftp://ftp.ncbi.nih.gov/genomes/Bacteria/Streptococcus\\_mitis\\_B6\\_uid46097/NC\\_013853.fna](ftp://ftp.ncbi.nih.gov/genomes/Bacteria/Streptococcus_mitis_B6_uid46097/NC_013853.fna)
